# Supplementary material
Source: publisher figshare collection journal article supplement (https://acs.figshare.com/ndownloader/files/4574962)
Supplement: Supplementary file 1 [file 4574962]

**Supporting Information**  
**for**  
**Stereochemistry of the C-S Bond Cleavage in**  
***Cis*-2-methylcyclopentyl Phenyl Sulfoxide Radical Cation**

**Enrico Baciocchi, Osvaldo Lanzalunga,**

**Andrea Lapi, Laura Maggini**

|                                                                                                             |           |
|-------------------------------------------------------------------------------------------------------------|-----------|
| <b>Instrumentation</b>                                                                                      | <b>S2</b> |
| <b>Materials</b>                                                                                            | <b>S2</b> |
| <b>C-S bond dissociation free energy for <i>cis</i>-2-methylcyclopentyl phenyl sulfoxide radical cation</b> | <b>S3</b> |
| <b>References for Supporting Information</b>                                                                | <b>S4</b> |

**Instrumentation.**  $^1\text{H}$ -NMR spectra were recorded on a 300 MHz spectrometer in  $\text{CD}_3\text{CN}$ . GC-MS analyses were performed on a gas chromatograph equipped with a 30m x 0.25 mm silica capillary column coated with 5% diphenyl- and 95% dimethylpolysiloxane from 50 to 250 °C coupled with a mass selective detector at 70 eV. GC analyses were carried out on a gas chromatograph equipped with a 30m x 0.25 mm silica capillary column coated with 5% diphenyl- and 95% dimethylpolysiloxane from 50 to 250 °C.

**Materials.** Acetonitrile (HPLC grade) was distilled over CaH.  $\text{TiO}_2$  (anatase, dried at 110 °C) and  $\text{Ag}_2\text{SO}_4$  were commercially available. *Cis*-2-methylcyclopentyl phenyl sulfoxide (**1**) was prepared by oxidation of the corresponding sulfide with sodium periodate in aqueous ethanol<sup>S1</sup> and characterized according to  $^1\text{H}$  NMR  $^{13}\text{C}$  NMR and mass spectral data reported in the literature.<sup>S2</sup> *Cis*-2-methylcyclopentyl phenyl sulfide was prepared by reaction of *trans*-2-methyl-cyclopentanol with *N*-benzenesulfonyl-succinimide.<sup>S3</sup> 3-Cyano-*N*-methylquinolinium perchlorate was prepared and characterized as previously described.<sup>S4</sup>

1-Methylcyclopentanol, *trans*-2-methylcyclopentanol, 2-methylcyclopentanols (mixture of isomers *cis/trans*) and diphenyl disulfide are commercially available. 1-Methylcyclopentyl acetamide was prepared from 1-methylcyclopentanol by the Ritter reaction.<sup>S5</sup> Mp: 97-98°C (Lit. 98-99°C).<sup>S6</sup> GC-MS  $m/z$  (rel. intensity) 126 (7), 112 (19), 99 (22), 84 (30), 70 (100), 60 (93), 56 (37). 2-Methylcyclopentyl acetamides (mixture of isomers *cis/trans*) were prepared by acetylation of *cis/trans*-2-methylcyclopentylamines synthesized according to the literature.<sup>S7</sup> GC-MS  $m/z$  rel. intensity)  $\text{M}^+$  141 (7), 126 (4), 112 (6), 98 (29), 82 (17), 70 (28), 60 (100), 56 (94), 55 (10).

Phenyl benzenethiosulfonate and phenyl benzenethiosulfinate were prepared according to literature procedures.<sup>S8</sup>

## C-S bond dissociation free energy for *cis*-2-methylcyclopentyl phenyl sulfoxide radical cation

The C-S bond dissociation free energy (BDFE) value for *cis*-2-methylphenyl phenyl sulfoxide radical cation ( $\mathbf{1}^{+\bullet}$ ) was calculated by using the following thermochemical cycle (Scheme S1):

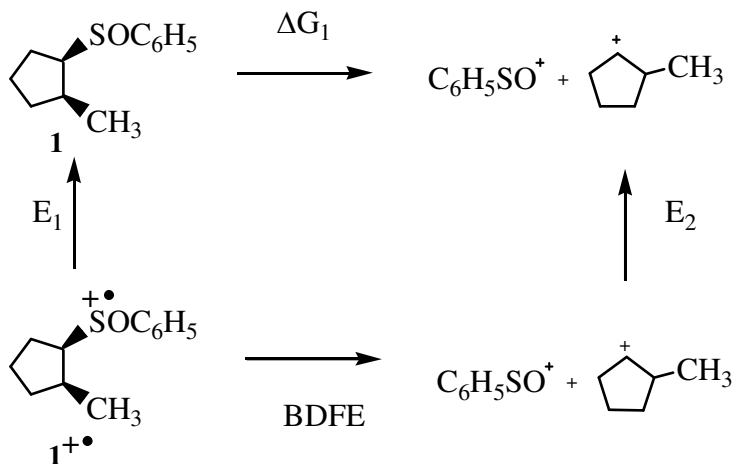

**Scheme S1**

$$\text{BDFE} = \Delta G_1 + F(E_2 - E_1)$$

$E_1$  values is the peak reduction potential of  $\mathbf{1}^{+\bullet}$ - $\mathbf{5}^{+\bullet}$   $E_1$  taken as 2.0 V vs SCE (peak reduction potential of methyl phenyl sulfoxide radical cation.<sup>S9</sup>  $E_2$  is the oxidation potential of the secondary cyclopentyl radical which can be estimated equal to that of the isopropyl radical (0.47 V vs SCE).<sup>S10</sup>

$\Delta G_1$ , the C-S bond dissociation free energy of the neutral  $\mathbf{1}$ , was determined from the C-S bond dissociation energy (BDE) applying an entropic correction ( $T\Delta S^\circ$ ) of 10 kcal mol<sup>-1</sup> (this value has been considered similar to the entropy change associated with the homolytic C-S bond cleavage of thioanisole<sup>S11</sup>). For the C-S BDE of  $\mathbf{1}$  we have added 2.2 kcal to the calculated C-S BDE of *t*-butyl phenylsulfoxide obtained by DFT calculations (36.2 kcal mol<sup>-1</sup>)<sup>S9</sup> on the basis of the different stability of isopropyl and *t*-butyl radical.<sup>S12</sup>

## References for Supporting Information

- S1. Kuksman, R. *J. Chem. Soc. Perkin Trans. 2*, **1985**, 683.
- S2. Ke, B.-W.; Lin, C.-H.; Tsai, Y.-M. *Tetrahedron* **1997**, *53*, 7805-7826.
- S3. Tsai, Y.-M.; Chang, F.-C.; Huang, J.; Shiu, C.-L. *Tetrahedron Lett.* **1989**, *30*, 2121-2124.
- S4. Kato, S.; Nakata, J.; Imoto, E. *Bull. Chem. Soc. Jpn.* **1971**, *44*, 1928-1933.
- S5. Benson, F. R.; Ritter, J. J. *J. Am. Chem. Soc.* **1949**, *71*, 4128. Lusskin, R. M.; Ritter, J. J. *J. Am. Chem. Soc.* **1950**, *72*, 5577.
- S6. Kochetkov, N. K.; Khorlin, A. Ya.; Lopatina, K. I.; Vorotnikova, L. A. *Zh. Obshch. Khim.* **1959**, *29*, 3613.
- S7. Hutchins, R. O.; Su, W.-Y.; Sivakumar, R.; Cistone, F.; Stercho, Y. P. *J. Org. Chem.* **1983**, *48*, 3412.
- S8. Kice, J. L.; Rogers, T. E. *J. Am. Chem. Soc.* **1974**, *96*, 8015-8019. Jeyakumar, K.; Chand, D. K. *Tetrahedron. Lett.* **2006**, *47*, 4573-4576.
- S9. Baciocchi, E.; Del Giacco, T.; Lanzalunga, O.; Mencarelli, P.; Procacci, B. *J. Org. Chem.* **2008**, *73*, 5675-5682.
- S10. Wayner, D. D. M.; Houman, A. *Acta Chem. Scand.* **1998**, *52*, 377-384.
- S11. Baciocchi, E.; Del Giacco, T.; Gerini, M. F.; Lanzalunga, O. *Org. Lett.* **2006**, *8*, 641-644.
- S12. Pasto, D. J.; Krasnansky, R.; Zercher, C. *J. Org. Chem.* **1987**, *52*, 3062-3072.
